# Supplementary figures and images for: Is a body mass index of less than 18.5 kg/m2 associated with an increased susceptibility to mild cognitive impairment? A cross-sectional study conducted in China
Source: PubMed Central journal article supplement — BMJ Open. 2024 Dec 3;14(12):e076622. doi: 10.1136/bmjopen-2023-076622 (PMC11624800; doi:10.1136/bmjopen-2023-076622), 2024-12-03

## Study flow chart

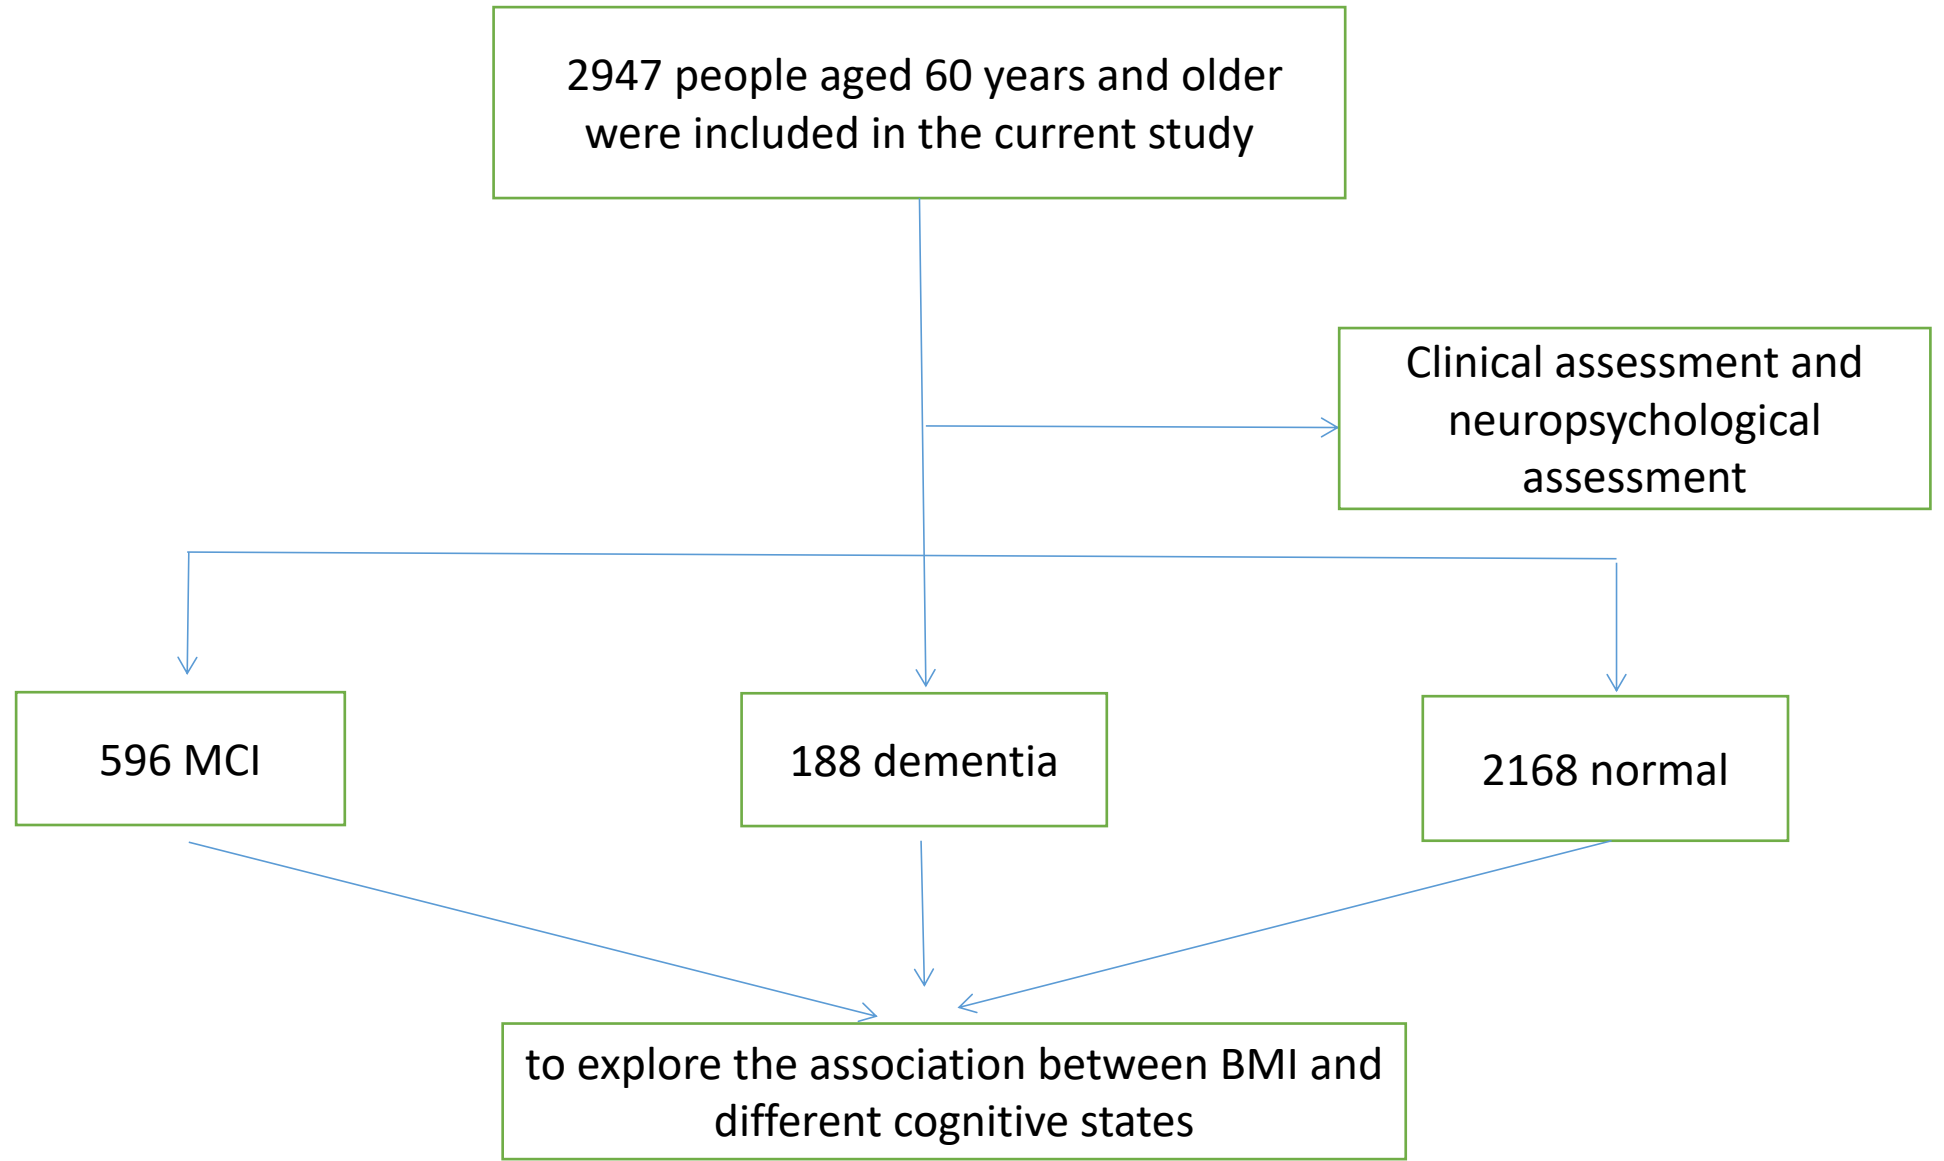

Supplement: bmjopen-14-12-s001.pdf [file bmjopen-14-12-s001.pdf]
